# Supplementary material for: Land Cover and Climate Change May Limit Invasiveness of Rhododendron ponticum in Wales
Source: PubMed Central journal article supplement (PMC5968121; doi:10.3389/fpls.2018.00664), 2018-05-18
Supplement: Image_2.pdf [file Image_2.pdf]

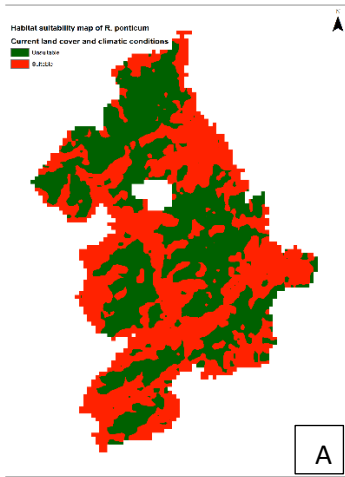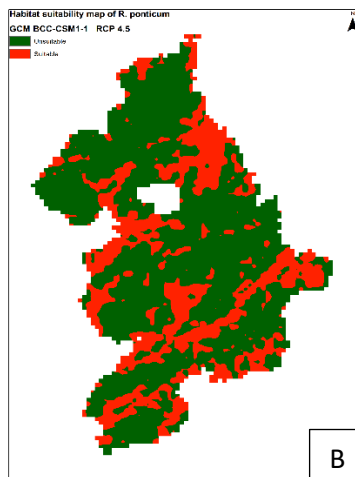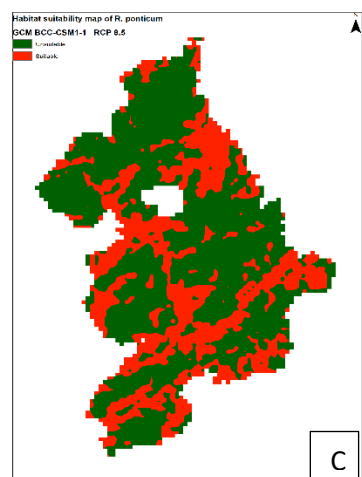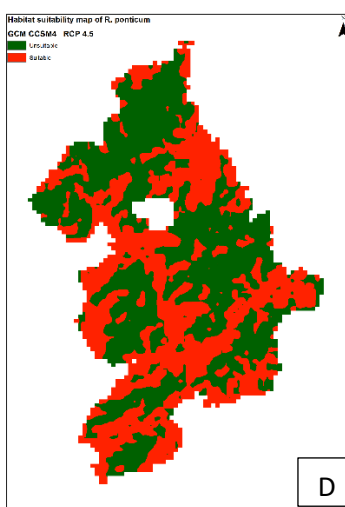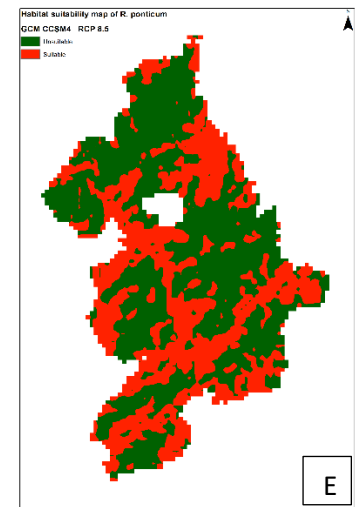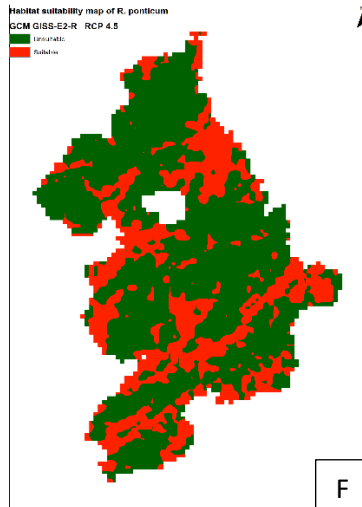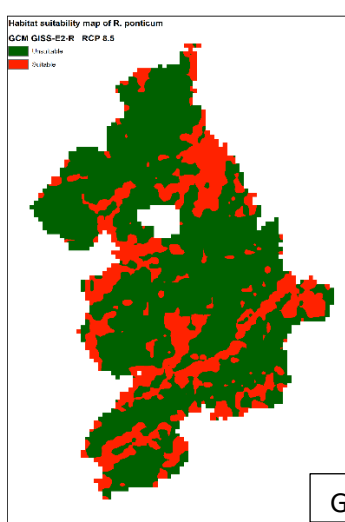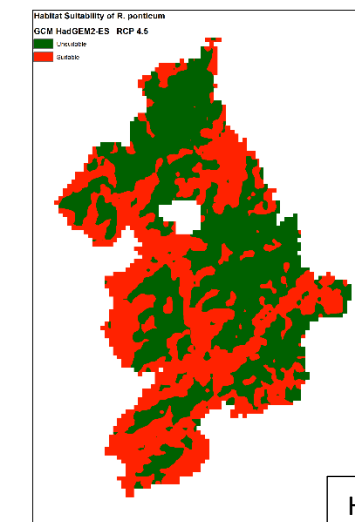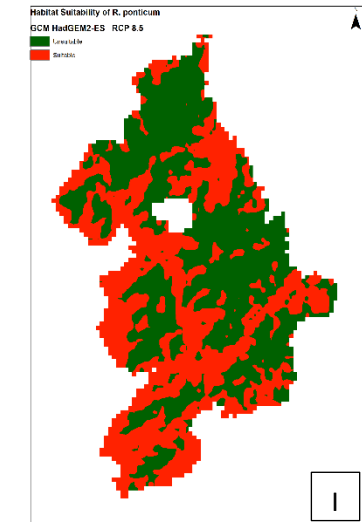

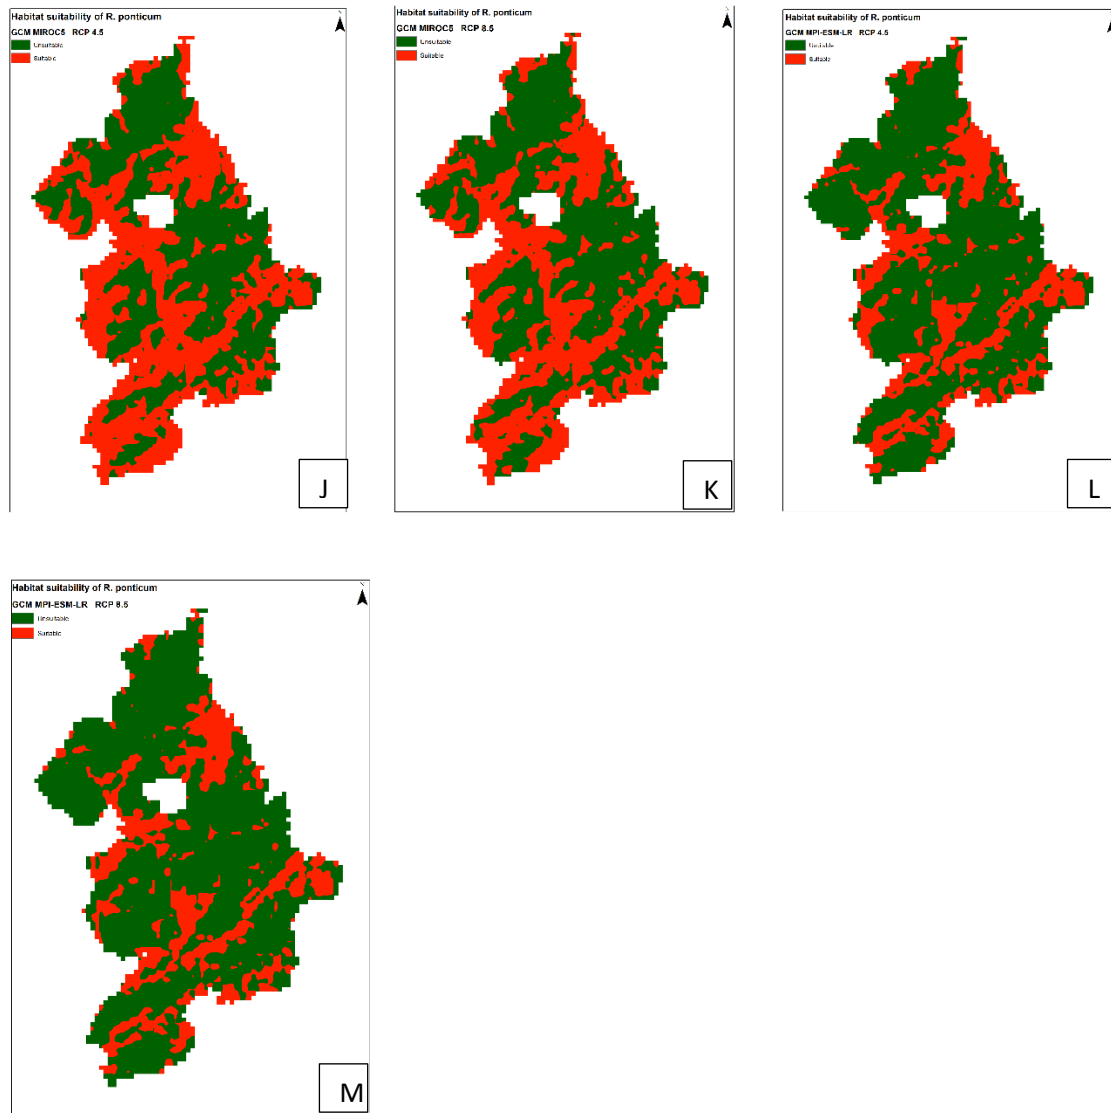

**Fig. 4.** Binary habitat suitability maps of *R. ponticum* in Snowdonia National Park under current land cover and climatic conditions (A) and future land cover and climate change scenarios: BCC-CSM1-1 (B), BCC-CSM1-1 (C), CCSM4 (D), CCSM4 (E), GISS-E2-R (F), GISS-E2-R (G), HadGEM2-ES (H), HadGEM2-ES (I), MIROC5 (J), MIROC5 (K), MPI-ESM-LR (L), MPI-ESM-LR (M)
